# Supplementary material
Source: Elsevier journal article supplement (https://www.sciencedirect.com/science/article/pii/S0300893218300605)
Supplement: mmc1 [file S0300893218300605:mmc1.doc]

SUPPLEMENTARY MATERIAL

**Figure of the supplementary material**

Clinical Frailty Scale


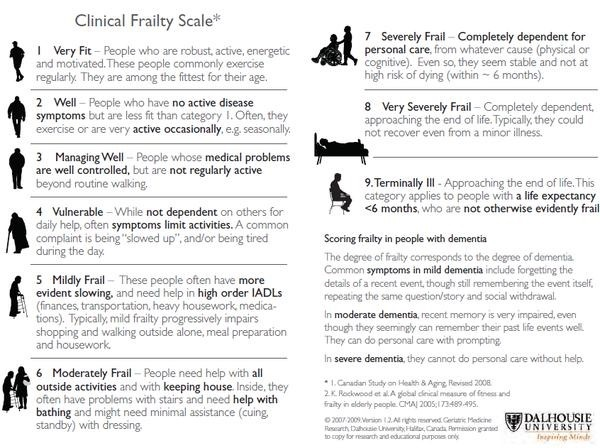


Reproduced with permission from Rockwood K.1

REFERENCE

1. Rockwood K. Clinical Frailty Scale. Available at: <http://camapcanada.ca/Frailtyscale.pdf>. Accessed 30 Jan, 2018.
